# Supplementary material for: Genomic profiling of newly diagnosed glioblastoma patients and its potential for clinical utility – a prospective, translational study
Source: PubMed Central journal article supplement (PMC7607169; doi:10.1002/1878-0261.12790), 2020-09-18
Supplement: MOL2-14-2727-s001.pdf [file MOL2-14-2727-s001.pdf]

|         |          |           |         |         |
|---------|----------|-----------|---------|---------|
| ABCB1   | CDX4     | HEATR7B2  | PIK3CA  | SULT1B1 |
| ABCC9   | CHEK2    | IDH1      | PIK3RI  | TCHH    |
| ADAM29  | COL1A2   | IDH2      | PLCH2   | TERT    |
| AFM     | CFAP47   | IL18RAP   | PODNL1  | TMEM147 |
| ALK     | DCAF12L2 | KEL       | POT1    | TP53    |
| ANKRD36 | DRD5     | KMT2C     | PTEN    | TPTE2   |
| ATRX    | DYNC1I1  | KRTAP20-2 | QKI     | TRPV6   |
| BCOR    | EGFR     | LCE4A     | RB1     | UGT2a3  |
| BRAF    | ERBB1    | LRRC55    | RFX6    | VEGFA   |
| BRCA1   | ERBB2    | LUM       | RPL5    | WNT2    |
| BRCA2   | ERBB3    | LZTR1     | SCN9A   | ZNF844  |
| GCSAML  | ERBB4    | MET       | SEMA3C  | ZNF99   |
| CALCR   | FGA      | MMP13     | SEMA3E  | ATM     |
| CARD6   | FOXR2    | NF1       | SEMG1   | MLH1    |
| CD3EAP  | FRMD7    | NLRP5     | SIGLEC8 | MSH2    |
| CDH18   | GABRA1   | NOTCH     | SLC26A3 | MSH6    |
| CDH9    | GABRA6   | ODF4      | SPRYD5  | PMS2    |
| CDHR3   | GPX5     | PARD6B    | SPTA1   | POLE    |
| CDKN2A  | H3F3A    | PDGFRA    | STAG2   | H3F3B   |

Table S1. Filter list for 95 genes used for mutation call.

| Gene    | Variant                                     | Variant                                     | Variant                                   |
|---------|---------------------------------------------|---------------------------------------------|-------------------------------------------|
| ABCB1   | c.3262G>A; p.D1088N                         | c.1738C>T; p.R580W                          |                                           |
| ABCC9   | c.2599G>A; p.V867I                          |                                             |                                           |
| ADAM29  | <b>c.1043G&gt;A; p.R348H</b>                | c.731T>C; p.L244S                           |                                           |
| ATRX    | c.6332G>A; p.R2111Q                         | <b>c.3967G&gt;T; p.E1323*</b>               | <b>c.6895_6896delCC;<br/>p.P2299fs*22</b> |
|         | c.5408G>A; p.R1803H                         | <b>c.4269_4272delGAAA;<br/>p.K1424fs*65</b> | <b>c.1507C&gt;T; p.Q503*</b>              |
|         | <b>c.6889_6890delTT; p.L2297fs*24</b>       | <b>c.4809G&gt;T; p.Q1603H</b>               |                                           |
| AFM     | c.433G>A; p.E145K                           | c.1954delG; p.D652fs*8                      | c.4049G>T; p.G1350V                       |
| BCOR    | c.3874G>T; p.E1292*                         | c.3800_3801dupCA;<br>p.G1268fs*68           |                                           |
| BRCA2   | c.3847_3848delGT; p.V1283fs*2               |                                             |                                           |
| BRAF    | <b>c.1786G&gt;C; p.G596R</b>                |                                             |                                           |
| CFAP47  | <b>c.1660C&gt;T; p.R554C</b>                |                                             |                                           |
| CALCR   | c.265G>T; p.V89L                            |                                             |                                           |
| CDH9    | c.2307C>A; p.D769E                          | c.2307C>A; p.D769E                          |                                           |
| CDKN2A  | <b>c.250G&gt;A; p.D84N</b>                  | <b>c.193G&gt;A; p.G65S</b>                  |                                           |
| CDH18   | c.1890_1892delGGT; p.V631del                |                                             |                                           |
| CDX4    | c.625A>C; p.N209H                           |                                             |                                           |
| CFAP47  | c.7400T>A; p.L2467Q                         | c.3827A>G; p.Y1276C                         |                                           |
| COL1A2  | c.1558G>T; p.G520C                          | c.3103G>A; p.A1035T                         |                                           |
| EGFR    | c.865G>A; p.A289T                           | <b>c.787A&gt;G; p.T263P</b>                 | c.664C>T; p.R222C                         |
|         | <b>c.866C&gt;T; p.A289V (x3)</b>            | <b>c.2156G&gt;C; p.G719A</b>                | <b>c.1793G&gt;T; p.G598V</b>              |
|         | <b>c.1793G&gt;T; p.G598V</b>                | c.1934C>G; p.S645C                          | <b>c.754C&gt;T; p.R252C</b>               |
|         | c.2006G>A; p.R669Q                          | <b>c.664C&gt;T; p.R222C</b>                 |                                           |
| ERBB4   | <b>c.2777C&gt;T; p.T926M</b>                |                                             |                                           |
| GABRA6  | c.198T>A; p.S66R                            | c.1223C>T; p.S408L                          |                                           |
| GABRB2  | c.442G>T; p.V148F                           |                                             |                                           |
| H3F3A   | <b>c.83A&gt;T; p.K28M</b>                   |                                             |                                           |
| IDH1    | <b>c.395G&gt;A; p. R132H (x5)</b>           |                                             |                                           |
| IL18RAP | c.475G>A; p. A159T                          | c.1234G>A; p.V412I                          |                                           |
| KEL     | c.1283G>A; p.R428H                          |                                             |                                           |
| KMT2C   | c.1555C>G; p.H519D                          | c.2015A>G; p.E672G                          |                                           |
| LZTR1   | c.727T>C; p.F243L                           | c.467A>G; p.K156R                           |                                           |
| MET     | c.2533C>A; p.L845I                          | c.1579A>C; p.S527R                          |                                           |
| MMP13   | c.120+1G>T                                  | c.998G>A; p.R333H                           |                                           |
| MSH2    | <b>c.1735A&gt;T; p.K579*</b>                |                                             |                                           |
| NF1     | <b>c.3479delG; p.G1160fs*6</b>              | <b>c.479+2T&gt;G (splice site)</b>          | <b>c.5565_5567delTCT; p.L1856del</b>      |
|         | <b>C.3739_3742delTTTG;<br/>p.F1247fs*18</b> | <b>c.4108C&gt;T; p.Q1370*</b>               | <b>c.1318C&gt;T; p.R440*</b>              |
|         | c.4169T>G; p.L1390R                         | <b>c.3861_3862delCT;<br/>p.F1287fs*26</b>   | c.4157delA; p.K1386fs*20                  |
|         | <b>c.5902C&gt;T; p.R1968*</b>               | <b>c.7996_7997delAG; p.S2666fs*5</b>        | <b>c.1888delG; p.V630*</b>                |

|         |                                        |                                        |                                    |
|---------|----------------------------------------|----------------------------------------|------------------------------------|
|         | c.7348C>T; p.R2450*                    | c.3916C>T; p.R1306*                    | c.1746CA>; p.C582*                 |
|         | c.1527+1_1527+4delGTAA;<br>p.Y2264fs*5 | c.6789_6792delTTAC;<br>p.Y2285fs*5     | c.3089C>A; p.S1030*                |
|         | c.7996_7997delAG; p.S2666fs*5          |                                        |                                    |
| NLRP5   | c.509G>A; p.G170E                      | c.1552C>T; p.R518C                     |                                    |
| NOTCH1  | c.2380G>C; p.E794Q                     | c.3317A>T; p.Q1106L                    |                                    |
| PDGFRA  | c.862T>A; p.Y288N                      | c.1607T>A; p.V536E                     | c.868T>C; p.C290R                  |
| PIK3CA  | c.1638G>T; p.Q546H                     | c.1030G>A; p.V344M                     | c.263G>A; p.R88Q                   |
|         | c.1634A>G; p.E545G                     | c.1134T>G; p.C378W                     | c.353G>A; p.G118D                  |
|         | c.3139C>T; p.H1074Y                    | c.277C>T; p.R93W                       |                                    |
| PIK3R1  | c.584delG; p.R195fs*15                 | c.918-920delGAG; p.R307del             | c.880A>G; p.N294D                  |
|         | c.827_829delCGA; p.T276del             | c.1691A>G; p.N564S                     | c.483dupA; p.R162fs*5              |
|         | c.1690A>G; p.N564D                     | c.918_920delGAG; p.R307del             | c.869A>G; p.D290G                  |
|         | c.316G>A; p.g106R                      | c.543_545delATA;<br>p.E181_Y182delinsD | c.937T>C; p.W313R                  |
|         | c.918_920delGAG; p.R307del             |                                        |                                    |
| PLCH2   | c.3571C>T; p.R1191C                    | c.1622T>C; p.V541A                     |                                    |
| PTEN    | c.388C>G; p.R130G                      | c.301dupA; p.I101fs*6                  | c.1133_1136delGATA; p.R378fs       |
|         | c.517C>T; p.R173C                      | c.302T>C; p.I101T                      | c.377C>G; p.A126G                  |
|         | c.492+1G>T (splice site)               | c.170delT; p.L57fs*42                  | c.1113delC; p.D371fs               |
|         | c.209+1G>A (splice site)               | c.385G>T; p.G129*                      | c.72C>G; p.D24E                    |
|         | c.517C>T; p.R173C                      | c.989_990delAA; p.K330fs*12            | c.737C>T; p.P246L                  |
|         | c.479C>A; p.T160N                      | c.139A>G; p.R47G                       | C800delA; p.K267fs*9               |
|         | c.388C>G; p.R130G (x2)                 | c.820delT; p.W274fs*2                  | c.728+1_728+4delGTAA (splice site) |
|         | c.567dupA; p.P190fs*12                 | c.209+1_209+4delGTAA                   | c.333G>A; p.W111*                  |
|         | c.955_958delACTT; p.T319*              | c.166T>G; p.F56V                       | c.518G>A; p.R173H                  |
|         | c.373A>G; p.K125E                      | c.955_958delACTT; p.T319*              | c.87T>G; p.Y29*                    |
|         | c.610C>A; p.P204T                      | c.209+1209+4delGTAA                    | c.987_990delTAAA;<br>p.N329fs*14   |
|         | c.945T>A; p.Y315*                      | c.466G>A; p.G156R                      | c.98T>C; p.I33T                    |
|         | c.907delA; p.I303fs*4                  | c.1007dupA; p.Y336*                    | c.212G>A; p.C71Y                   |
|         | c.389G>A; p.R130Q                      | c.697C>T; p.R233*                      |                                    |
| RB1     | c.368dupA; p.N123fs*8                  | c.446C>G; p.S149*                      | c.1422-1G>C (splice site)          |
|         | c.1494T>G; p.Y498*                     | c.763C>T; p.R255*                      | c.718A>T; p.K240*                  |
|         | c.2520+1G>A                            | c.1422-1G>C (splice site)              | c.264+1G>C (splice site)           |
|         | c.2663G>A; p.S888N                     | c.1575delC; p.F526fs*6                 | c.277C>T; p.Q93*                   |
|         | c.1499-1G>A (splice site)              |                                        |                                    |
| RPL5    | c.125delA; p.N42fs*10                  | c.3+1G>A (splice site)                 |                                    |
| SCN9A   | c.1901G>A; p.R634H                     | c.326T>C; p.L109P                      | c.3541A>G; p.S1181G                |
|         | c.1502C>T; p.S501L                     |                                        |                                    |
| SEMA3C  | c.328-1G>A                             |                                        |                                    |
| SLC26A3 | c.1697G>A; p.R566Q                     |                                        |                                    |
| STAG2   | c.2285_2289delAGAAA;<br>p.K762fs*21    | c.913C>T; p.R305*                      |                                    |
| SULT1B1 | c.824A>T; p.E275V                      |                                        |                                    |
| TCHH    | c.4322G>A; p.R1441H                    | c.2533C>T; p.R845C                     | c.513G>C; p.E1713Q                 |
|         | c.2318C>T; p.A773V                     | c.682C>T; p.Q228*                      | c.4873G>A; p.E1625K                |
| TERT    | c.3116C>T; p.T1039M                    |                                        |                                    |
| TP53    | c.422G>A; p.C141Y                      | c.292C>T; p.P98S                       | c.1024C>T; p.R342*                 |
|         | c.733G>A; p.G245S                      | c.646G>A; p.V216M                      | c.817C>T; p.R273C                  |
|         | c.451C>T; p.P151S                      | c.916C>T; p.R306*                      | c.749C>T; p.P250L                  |
|         | c.713G>A; p.C238Y                      | c.427G>A; p.V143M                      | c.649delG; p.V217fs*30             |
|         | c.445dupT; p.S149fs*32                 | c.818G>A; p.R273H                      | c.725G>T; p.C242F                  |
|         | c.844C>T; p.R282W                      | c.473G>A; p.R158H                      | c.814G>A; p.V272M                  |
|         | c.963dupA; p.322fs*15                  | c.517G>C; p.V173L                      | c.772G>T; p.E258*                  |
|         | c.746G>T; p.R249M                      | c.853G>A; p.E285K                      | c.1023_1024delCC; p.F341fs*5       |
|         | c.434T>G; p.L145R                      | c.817C>T; p.R273C                      | c.587G>C; p.R169P                  |
|         | c.200delC; p.P67fs*56                  | c.527G>A; p.C176Y                      | c.1024C>T; p.R342*                 |
|         | c.592G>T; p.E198*                      | c.712T>A; p.C238S                      | c.770T>A; p.L257Q                  |
|         | c.934_935dupAC; p.S313fs*33            | c.653_654delTG; p.V218fs*3             | c.524G>A; p.R175H                  |
|         | c.818G>A; p.R273H                      | c.832C>A; p.P278T                      | c.712T>A; p.C238S                  |
|         | c.653_654delTG; p.V218fs*3             | c.814G>A; p.R175H                      |                                    |
| TRPV6   | c.536G>A; p.R179H                      |                                        |                                    |
| UGT2A3  | c.350T>C; p.I117T                      |                                        |                                    |
| WNT2    | c.89T>A; p.M30K                        |                                        |                                    |

Table S2. A list of all tumor specific mutations called. Mutations in **bold** were defined as pathological. For definition, see Material and Method section.

| Covariate                                            | HR (95 % CI)     | P-value |
|------------------------------------------------------|------------------|---------|
| <b>Genes (2-fold change)</b>                         |                  |         |
| <i>TERT</i> promotor region                          | 1.62 (0.68-3.85) | 0.275   |
| <i>PTEN</i>                                          | 0.71 (0.30-1.67) | 0.438   |
| <i>CDKN2A/B</i>                                      | 1.00 (0.50-1.20) | 0.996   |
| <i>EGFR</i>                                          | 0.94 (0.55-1.62) | 0.831   |
| <i>MGMT</i> -WT                                      | 0.31 (0.17-0.58) | 0.0002* |
| <i>RB1</i>                                           | 0.64 (0.36-1.14) | 0.127   |
| <i>NPAS3</i>                                         | 0.64 (0.34-1.22) | 0.175   |
| <i>AKT1</i>                                          | 0.69 (0.36-1.30) | 0.248   |
| <i>IRS2</i>                                          | 0.67 (0.36-1.28) | 0.228   |
| <i>QKI</i>                                           | 1.06 (0.58-1.94) | 0.860   |
| <i>TP53</i>                                          | 0.58 (0.28-1.19) | 0.136   |
| <i>CDK4</i>                                          | 0.66 (0.33-1.31) | 0.232   |
| <i>CDKN2C</i>                                        | 0.73 (0.33-1.60) | 0.426   |
| <i>SMYDA</i>                                         | 0.32 (0.12-0.89) | 0.029*  |
| <i>MDM2</i>                                          | 0.56 (0.25-1.23) | 0.147   |
| <i>NF1</i>                                           | 0.81 (0.35-1.89) | 0.621   |
| <i>PDGFRA</i>                                        | 0.58 (0.21-1.62) | 0.300   |
| <i>PRDM2</i>                                         | 0.55 (0.17-1.77) | 0.314   |
| <i>MYC</i>                                           | 0.53 (0.23-1.25) | 0.148   |
| <i>MDM4</i>                                          | 0.56 (0.20-1.55) | 0.265   |
| <i>GRB2</i>                                          | 0.23 (0.06-0.94) | 0.040*  |
| <i>CCND2</i>                                         | 0.37 (0.12-1.19) | 0.097   |
| <i>HYDIN</i>                                         | 0.84 (0.26-2.32) | 0.734   |
| <i>LSAMP</i>                                         | 0.72 (0.26-2.02) | 0.535   |
| <i>CDKN2A</i>                                        | 1.89 (0.44-8.16) | 0.392   |
| <i>FGFR3</i>                                         | 0.23 (0.03-1.70) | 0.150   |
| <i>AKT3</i>                                          | 0.26 (0.04-1.90) | 0.184   |
| <i>ATRX</i>                                          | 1.00 (0.31-3.21) | 0.995   |
| <i>CCNE1</i>                                         | 1.07 (0.26-4.41) | 0.928   |
| <i>IDH1</i>                                          | 0.24 (0.03-1.76) | 0.161   |
| <b>Clinical variables</b>                            |                  |         |
| Age at diagnosis ( $\geq 70$ years vs. $< 70$ years) | 0.39 (0.22-0.70) | 0.001*  |
| Corticosteroid use (yes vs. no)                      | 0.56 (0.32-0.98) | 0.04*   |
| WHO performance status ( $\geq 2$ vs. 0-1)           | 0.40 (0.20-0.81) | 0.01*   |
| Completes aggressive treatment (yes vs. no)          | 2.32 (1.33-4.04) | 0.003*  |

Table S3: Univariate analyses modelling the probability of selected genes and clinical variables as compared to overall survival (OS). Fishers exact test.

| Covariate                                            | P-value |
|------------------------------------------------------|---------|
| Genes (2-fold change)                                |         |
| <i>TERT</i> promotor region                          | 0.88    |
| MGMT-WT                                              | 0.02*   |
| <i>CDKN2A/B</i>                                      | 0.36    |
| <i>EGFR</i>                                          | 0.47    |
| <i>CDK4</i>                                          | 0.71    |
| <i>PDGFRA</i>                                        | 1.00    |
| <i>MDM4</i>                                          | 0.68    |
| <i>PTEN</i>                                          | 1.00    |
| <i>MDM2</i>                                          | 0.30    |
| <i>IDH1</i>                                          | 0.15    |
| <i>CDKN2A</i>                                        | 1.00    |
| <i>MET</i>                                           | 1.00    |
| <i>MYC</i>                                           | 1.00    |
| <i>RB1</i>                                           | 0.40    |
| <i>CCND2</i>                                         | 0.40    |
| <i>CDKN2C</i>                                        | 1.00    |
| <i>AKT1</i>                                          | 1.00    |
| <i>AKT3</i>                                          | 0.40    |
| <i>FGFR2</i>                                         | 0.40    |
| <i>NPAS3</i>                                         | 0.40    |
| <i>PRDM2</i>                                         | 1.00    |
| <i>QKI</i>                                           | 1.00    |
| Clinical variables                                   |         |
| Age at diagnosis ( $\geq 70$ years vs. $< 70$ years) | 0.51    |
| Corticosteroid use (yes vs. no)                      | 0.09    |
| WHO performance status ( $\geq 2$ vs. 0-1)           | 0.08    |

Table S4. Fishers exact test for modelling the probability of completing the planned treatment.  $N = 77$  whereof 31 has completed radiotherapy/Temozolomide and adjuvant Temozolomide and 46 has not. Only genes with biallelic losses or amplifications are shown.

## A

| Variables                     | p-value | Hazard ratio | 95% confidence interval |
|-------------------------------|---------|--------------|-------------------------|
| <b>TMB high vs low/median</b> | 0.005   | 2.87         | 1.38-5.97               |
| <b>CI median vs high/low</b>  | 0.04    | 1.78         | 1.04-3.04               |

## B

| Variables                                           | p-value | Hazard ratio | 95% confidence interval |
|-----------------------------------------------------|---------|--------------|-------------------------|
| <b>TMB high vs low/median</b>                       | 0.009   | 3.29         | 1.35-8.02               |
| <b>PS 0-1 vs <math>\geq 2</math></b>                | 0.48    | 0.71         | 0.27-1.84               |
| <b>Age &lt; 70 vs <math>\geq 70</math></b>          | 0.01    | 0.41         | 0.21-0.81               |
| <b>Steroid (mg) <math>\leq 10</math> vs &gt; 10</b> | 0.22    | 0.67         | 0.35-1.27               |
| <b>MGMT-methylated vs wild-type</b>                 | 0.00005 | 3.82         | 2.0-7.29                |

| Variables                                           | p-value | Hazard ratio | 95% confidence interval |
|-----------------------------------------------------|---------|--------------|-------------------------|
| <b>CI median vs low/high</b>                        | 0.13    | 1.51         | 0.88-2.60               |
| <b>PS 0-1 vs <math>\geq 2</math></b>                | 0.01    | 0.37         | 0.18-0.80               |
| <b>Age &lt; 70 vs <math>\geq 70</math></b>          | 0.001   | 0.33         | 0.17-0.62               |
| <b>Steroid (mg) <math>\leq 10</math> vs &gt; 10</b> | 0.53    | 0.82         | 0.44-1.52               |
| <b>MGMT-methylated vs wild-type</b>                 | 0.00003 | 4.04         | 2.10-7.77               |

Table S5. Tumor mutational burden (TMB) and chromosomal instability (CI) with the different variables (performance status (PS), age, steroid dose and MGMT-status) shown. Assessed using univariate (A) and multivariate (B) Cox proportional hazard models.

| TMB High versus Median and Low |         |         |             |                  |
|--------------------------------|---------|---------|-------------|------------------|
| Gene Symbol                    | p-value | q-value | Fold change | Chromosomal Loc. |
| <i>EBF1</i>                    | 0,00    | 1,00    | 2,2         | chr5q34          |
| <i>LOC105377656</i>            | 0,02    | 1,00    | 2,2         | ---              |
| <i>GAS2</i>                    | 0,02    | 1,00    | 2,2         | chr11p14.3       |
| <i>FSTL5</i>                   | 0,04    | 1,00    | 2,1         | chr4q32.3        |
| <i>GPX3</i>                    | 0,04    | 1,00    | 1,9         | chr5q33.1        |
| <i>DSP</i>                     | 0,01    | 1,00    | 1,8         | chr6p24          |
| <i>DLX5</i>                    | 0,04    | 1,00    | 1,8         | chr7q22          |
| <i>DACH1</i>                   | 0,05    | 1,00    | 1,7         | chr13q22         |
| <i>LHX8</i>                    | 0,01    | 1,00    | 1,7         | chr1p31.1        |
| <i>IGF1</i>                    | 0,02    | 1,00    | 1,7         | chr12q23.2       |
| <i>CACNA2D1</i>                | 0,03    | 1,00    | 1,6         | chr7q21-q22      |
| <i>APELA</i>                   | 0,01    | 1,00    | 1,6         | chr4q32          |
| <i>DLX1</i>                    | 0,02    | 1,00    | 1,6         | chr2q32          |
| <i>KANK4</i>                   | 0,00    | 1,00    | 1,6         | chr1p31.3        |
| <i>DLX2</i>                    | 0,00    | 1,00    | 1,6         | chr2q32          |
| <i>MATN3</i>                   | 0,00    | 1,00    | 1,6         | chr2p24-p23      |
| <i>DPT</i>                     | 0,04    | 1,00    | 1,6         | chr1q12-q23      |
| <i>TMEM119</i>                 | 0,05    | 1,00    | 1,5         | chr12q23.3       |

  

| GSEA - TMB High versus Median and Low |      |         |     |     |      |     |
|---------------------------------------|------|---------|-----|-----|------|-----|
| Geneset                               | Size | Matches | ES  | NES | p    | q   |
| HALLMARK_TGF_BETA_SIGNALING           | 54   | 54      | 0,6 | 1,9 | 0,00 | 0,1 |
| HALLMARK_HEDGEHOG_SIGNALING           | 36   | 36      | 0,5 | 1,7 | 0,01 | 0,3 |
| HALLMARK_WNT_BETA_CATENIN_SIGNALING   | 42   | 41      | 0,4 | 1,4 | 0,08 | 1   |

  

| CI Median versus Low and High |         |         |             |                 |
|-------------------------------|---------|---------|-------------|-----------------|
| Gene Symbol                   | p-value | q-value | Fold change | Chromosome Loc. |
| <i>SLITRK3</i>                | 0,00    | 0,66    | 2,0         | chr3q26.1       |
| <i>TRDC</i>                   | 0,05    | 0,75    | 2,0         | chr14q11        |
| <i>VEGFA</i>                  | 0,00    | 0,66    | 1,9         | chr6p12         |
| <i>IGFBP5</i>                 | 0,00    | 0,58    | 1,9         | chr2q35         |
| <i>CPNE4</i>                  | 0,02    | 0,72    | 1,8         | chr3q22.1       |
| <i>HLA-DRB1</i>               | 0,04    | 0,75    | 1,8         | chr6p21.3       |
| <i>ART3</i>                   | 0,01    | 0,72    | 1,7         | chr4q21.1       |
| <i>FAM19A1</i>                | 0,05    | 0,75    | 1,7         | chr3p14.1       |
| <i>PLPPR5</i>                 | 0,02    | 0,72    | 1,6         | chr1p21.3       |
| <i>ADM</i>                    | 0,04    | 0,75    | 1,6         | chr11p15.4      |
| <i>GRB14</i>                  | 0,02    | 0,72    | 1,6         | chr2q22-q24     |
| <i>TMEM178A</i>               | 0,01    | 0,72    | 1,6         | chr2p22.1       |
| <i>TNFAIP6</i>                | 0,03    | 0,74    | 1,6         | chr2q23.3       |
| <i>FOXP1</i>                  | 0,01    | 0,72    | 1,5         | chr14q13        |

  

| GSEA - CI Median versus Low and High |      |         |      |      |      |     |
|--------------------------------------|------|---------|------|------|------|-----|
| Geneset                              | Size | Matches | ES   | NES  | p    | q   |
| HALLMARK_CHOLESTEROL_HOMEOSTASIS     | 74   | 72      | 0,51 | 1,77 | 0,02 | 0,3 |
| HALLMARK_APICAL_JUNCTION             | 200  | 192     | 0,38 | 1,47 | 0,07 | 1   |
| HALLMARK_WNT_BETA_CATENIN_SIGNALING  | 42   | 41      | 0,41 | 1,38 | 0,09 | 1   |

Table S6. Gene set enrichments with chromosomal location among glioblastoma subclasses and according to chromosomal instability (CI) and tumor mutational burden (TMB). Enrichments were examined in the molecular signatures database (MSig) among the all curated gene sets (tumor classes) or the HALLMARK gene sets (CI and TMB). The uncorrected NES, p and q values are indicated.

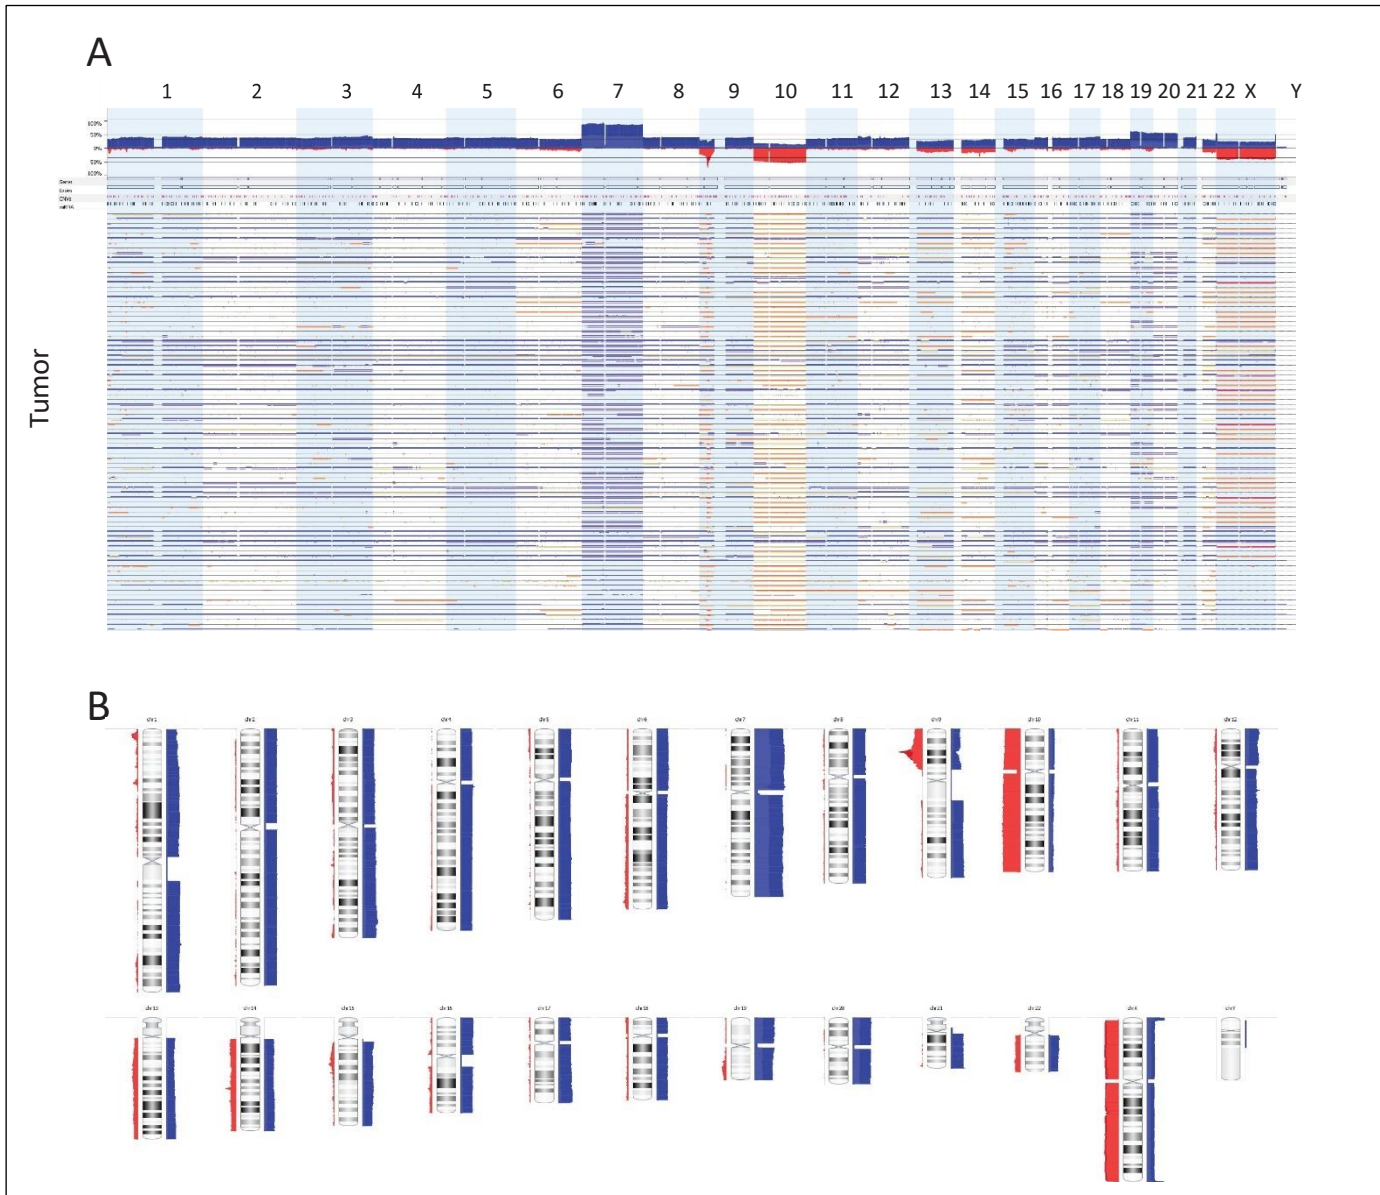

Figure S1. Frequency plots of glioblastoma cohort.

A: Frequency plot of the cohort (upper plot) and frequency plots for individual samples. Blue marking indicates gains/amplification and red marking indicates deletions. Yellow marking of plots for individual samples marks LOH areas. The most common chromosomal aberrations in the glioblastoma cohort was gain of chromosome 7 (>80%), deletion of 9p with biallelic deletion in area containing *CDKN2A/B* (>80%) and deletion of chromosome 10 including *PTEN* on the q-arm of the chromosome (>50%).

B: Alternative frequency plot displaying chromosomal aberrations for the glioblastoma cohort on individual chromosomes. Marking and conclusion as for A.

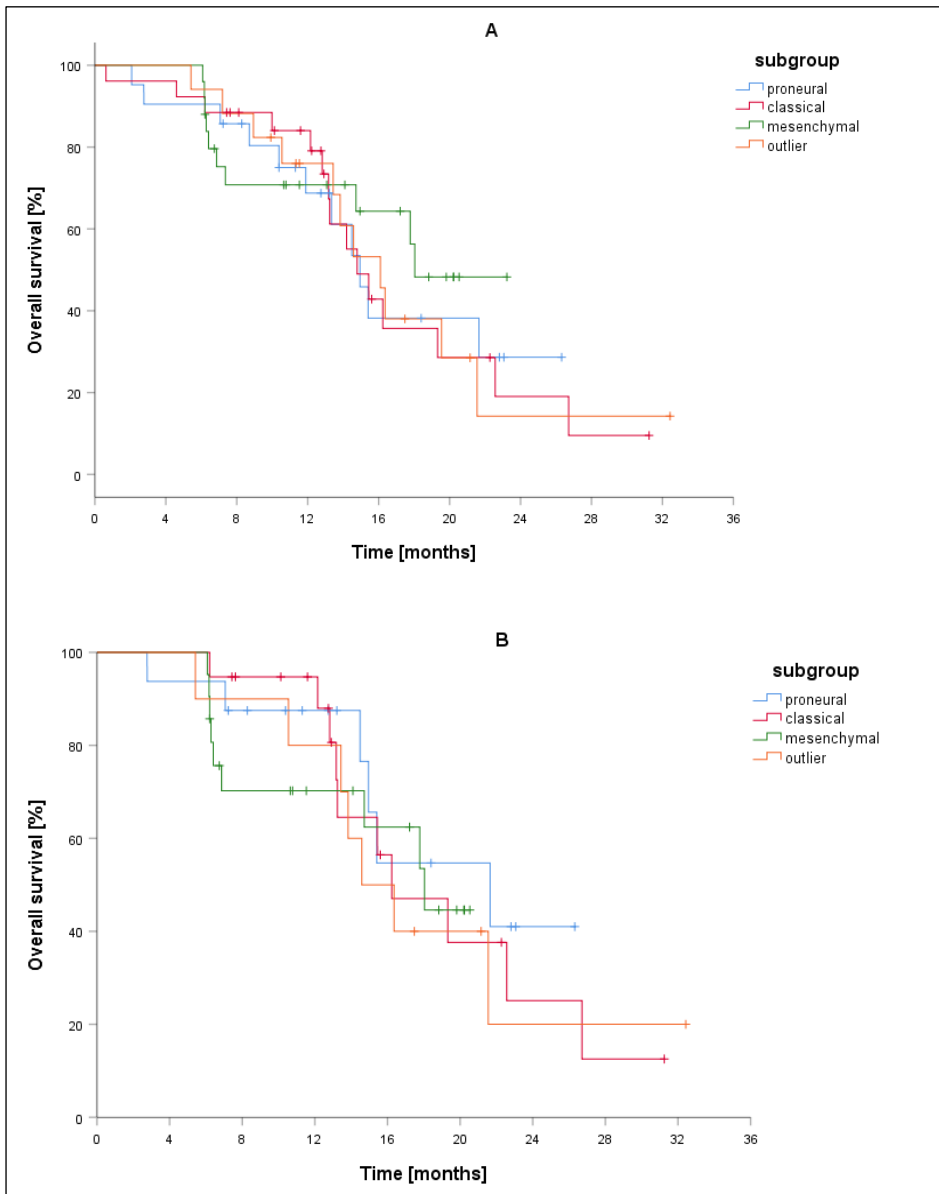

Figure S2A-B. Kaplan Meier curves. Overall survival and subgroup distribution.

A: Regardless of treatment N = 89. No difference in overall survival and subgroup distribution. P = 0.85

B: In the TMZ/RT treated group. N = 66. No difference in overall survival and subgroup distribution. P = 0.84



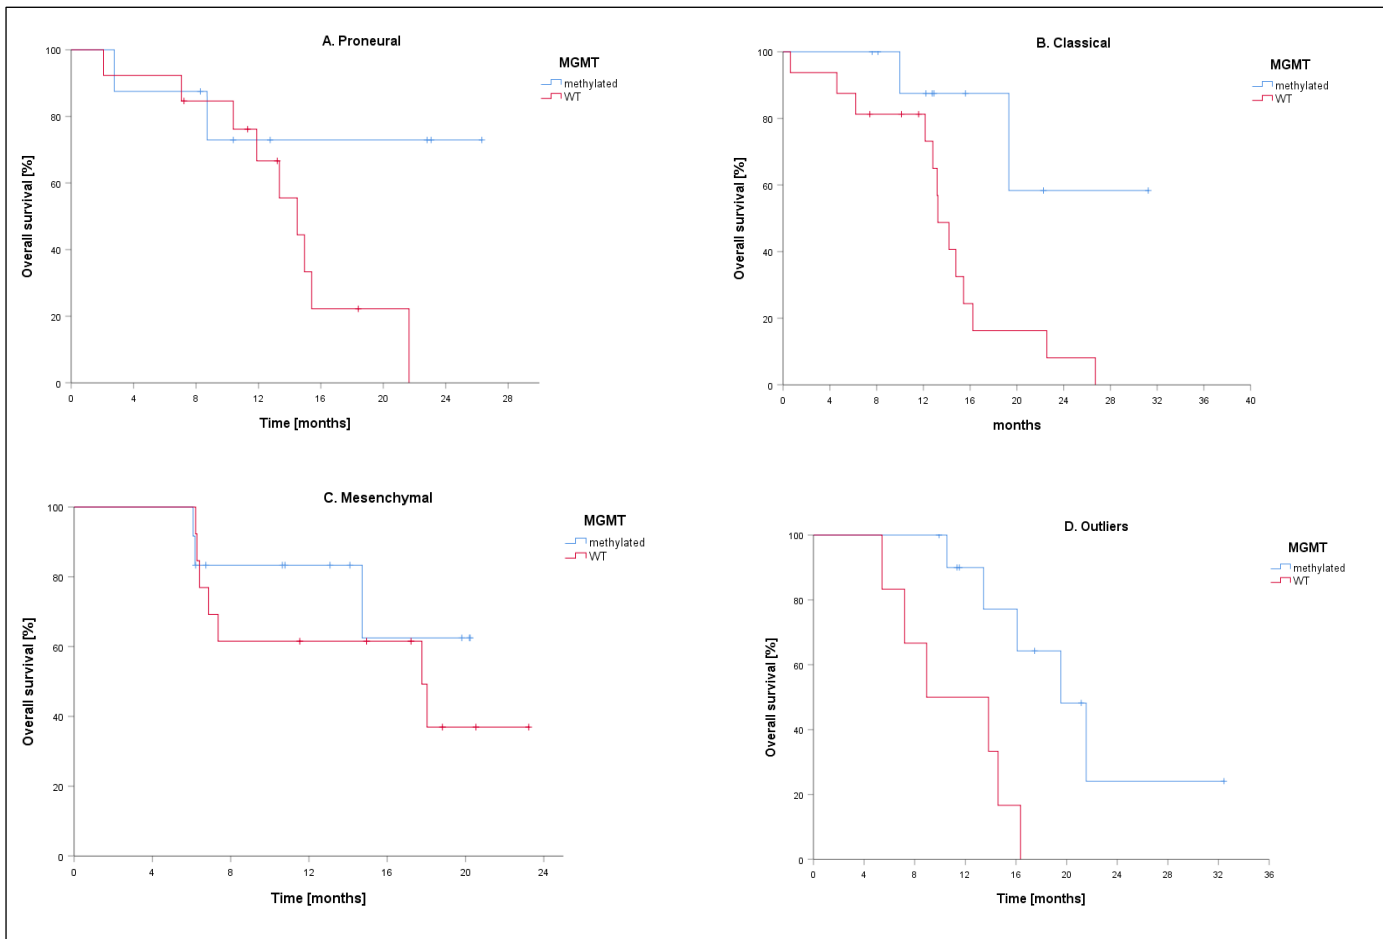

Figure S3A-E. Kaplan-Meier curves with MGMT-status and overall survival (OS) in each subgroup, regardless of treatment. A: Proneural. N = 21 (MGMT-WT, N=13 / MGMT-meth, N=8). Median OS of 14.5 months vs. not reached. P = 0.11. (95% CI: 12.7-17.2). B: Classical. N = 26 (MGMT-WT, N=16 / MGMT-meth, N=10). Median OS of 13.2 months vs. not reached. P = 0.02. (95% CI: 12.4-17.2). C: Mesenchymal. N = 25 (MGMT-WT, N=13 / MGMT-meth, N=12). Median OS of 17.8 vs. not reached. P = 0.39. (95% CI: 4.7-30.9). D: Outlier. N = 17 (MGMT-WT, N=6 / MGMT-meth, N=11). Median OS of 19.5 (95% CI: 14.6-24.4) vs. 8.9 months, respectively. P = 0.005 (95% CI: 1.0-16.9).

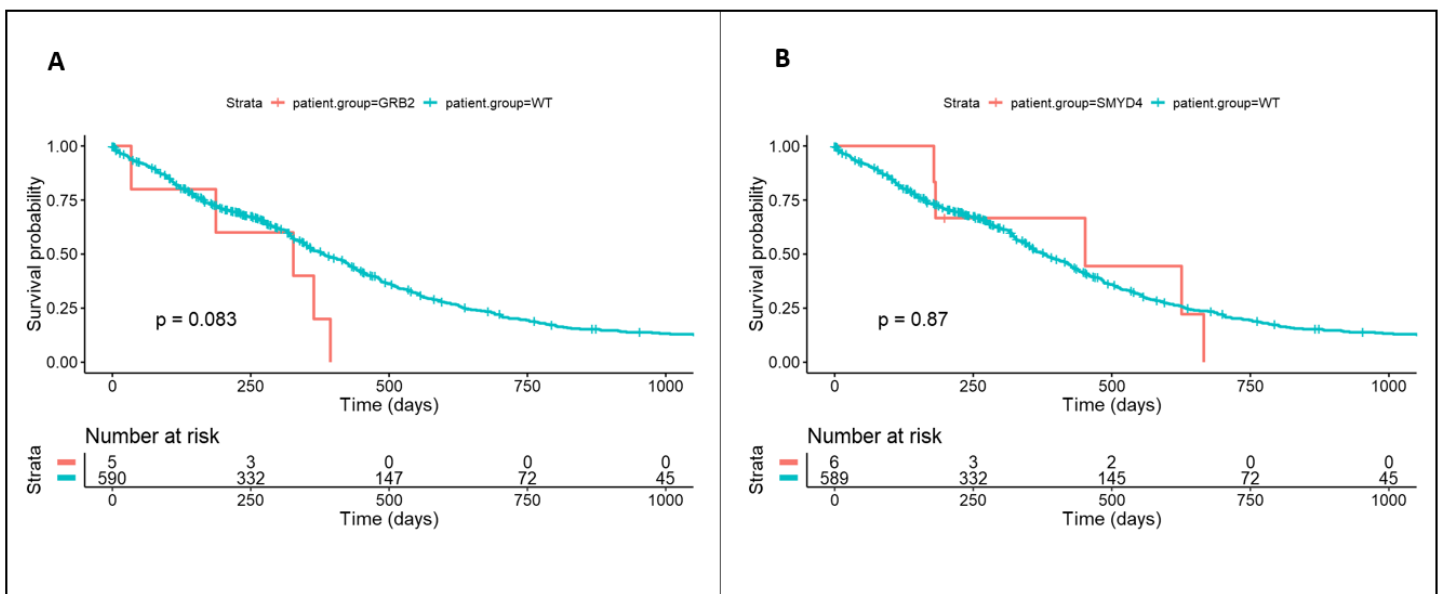

Figure S4A-B. Kaplan-Meier curves with *GRB2* and *SMYD4* status and overall survival (OS). Data from the TCGA dataset. A: *GRB2* mutation was identified in 5/596 samples. A trend towards a worse OS was found in the mutated samples. P = 0.08. B: *SMYD4* mutation was identified in 6/596 samples. No difference in OS was found. P = 0.87.

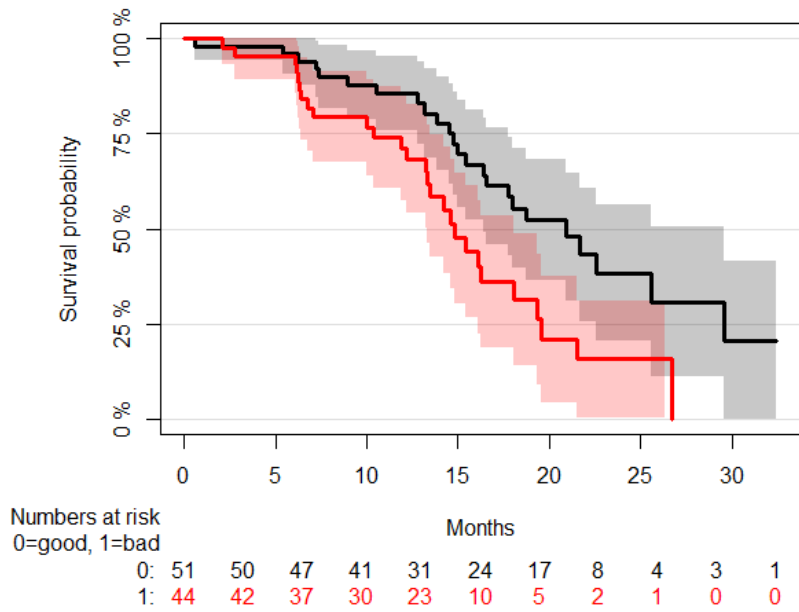

Figure S5. Kaplan-Meier curve with numbers at risk for overall survival (OS) for the bad prognostic group (tumor mutational burden (TMB)-high + chromosomal instability (CI)-median) vs. the good prognostic group (TMB-median/low + CI-high + low). The bad prognostic group had a significantly worse OS of 14.8 months (95% CI: 12.4-17.1) vs. 20.9 months (95% CI: 15.9-25.9), respectively (p=0.008).

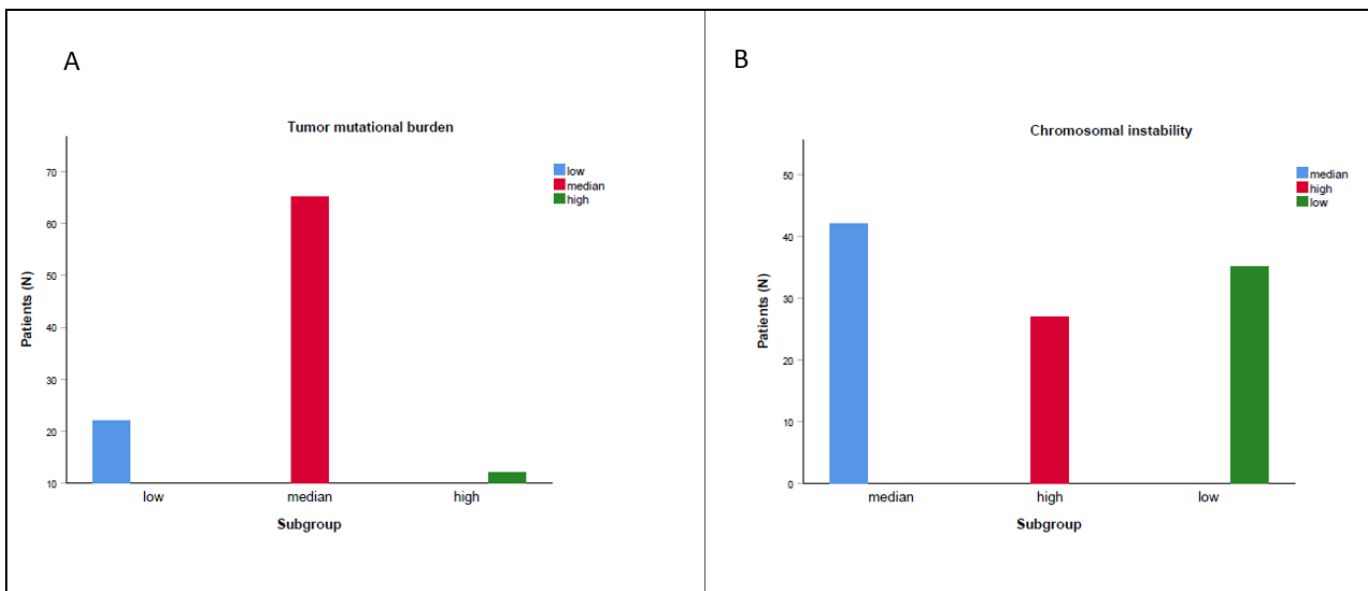

Figure S6. Histogram distribution.  
 A: Tumor mutational burden (TMB) with TMB-low (0-1.5, N=22), TMB-median (1.6-2.9, N=65) and TMB-high ( $\geq 3.0$ , N=12). Total N=99.  
 B: Chromosomal instability (CI) with CI-low (0-7 segmental chromosomal aberrations (SCA), N=35), CI-median (8-15 SCA, N=42) and CI-high (>15 SCA or aneuploid background, N=27). Total N=104
